# Supplementary material for: Screening of Multitarget Compounds against Acetaminophen Hepatic Toxicity Using In Silico, In Vitro, and In Vivo Approaches
Source: MDPI journal article supplement (doi:10.3390/molecules29020428), 2024-01-16
Supplement: s1 [file s1]

## Supplementary Materials:

**Table S1.** List of compounds selected for docking analysis from each plant.

| <i>C. longa</i>                                                  |                                                                      |
|------------------------------------------------------------------|----------------------------------------------------------------------|
| (+)-Alpha-Curcumene                                              | (-)-Alpha-Cedrene                                                    |
| Ar-Turmerone                                                     | BETA-ELEMENE                                                         |
| Curcumenol                                                       | Beta-Elementone                                                      |
| Beta-Vetivenene                                                  | Gamma-Curcumene                                                      |
| Calebin-A                                                        | Beta-Sesquiphellandrene                                              |
| Curcumin                                                         | Beta-Curcumene                                                       |
| Bisdemethoxycurcumin                                             | 1-(4-Hydroxy-3,5-Dimethoxyphenyl)                                    |
| Demethoxycurcumin                                                | 2-Methoxy-4-Vinylphenol                                              |
| Vanillin                                                         | Vanillic Acid                                                        |
| (3Z,7Z)-3,7-dimethyl-10-propan-2-ylidenecyclodeca-3,7-dien-1-one | 6R)-2-methyl-6-[(1R)-4-methylidenecyclohex-2-en-1-yl]hept-2-en-4-one |
| <i>C. zeylanicum</i>                                             |                                                                      |
| RUTIN                                                            | Cis-P-Coumaric Acid                                                  |
| Acarbose                                                         | Cinnamate                                                            |
| Quercetin                                                        | Eugenol                                                              |
| Gallic Acid                                                      | CINNAMIC ACID                                                        |
| SINAPIC ACID                                                     | BENZYL BENZOATE                                                      |
| 3,4-DIHYDROXYBENZOIC ACID                                        | Eugenol Acetate                                                      |
| Vanillic Acid                                                    | Cinnamyl Acetate                                                     |
| Trans-2-Hydroxycinnamic Acid                                     | Cinnamaldehyde                                                       |
| (-)-Linalool                                                     | D-CAMPHOR                                                            |
| (-)-Endo-Alpha-Bergamotene                                       | (1R,9S)-4,11,11-trimethyl-8-methylidenebicyclo[7.2.0]undec-4-ene     |

**Table S2.** Property profile of top five selected compounds from *C. longa* plant against two selected receptors.

| Sr. | Ligand                            | Receptor/Enzymes | PDB Code | S-Score | RMSD |
|-----|-----------------------------------|------------------|----------|---------|------|
| 1   | Curcumin                          | CYP2E1           | 3e6i     | -14.3   | 0.99 |
| 2   | Calebin                           | CYP2E1           | 3e6i     | -14.1   | 1.60 |
| 3   | Demethoxycurcumin                 | CYP2E1           | 3e6i     | -13.4   | 0.82 |
| 4   | 1-(4-Hydroxy-3,5-Dimethoxyphenyl) | CYP2E1           | 3e6i     | -13.3   | 0.77 |
| 5   | Bisdemethoxycurcumin              | CYP2E1           | 3e6i     | -12.7   | 1.07 |
| 6   | 1-(4-Hydroxy-3,5-Dimethoxyphenyl) | TLR2             | 1FYW     | -12.5   | 3.00 |
| 7   | Calebin                           | TLR2             | 1FYW     | -12.3   | 1.28 |
| 8   | Demethoxycurcumin                 | TLR2             | 1FYW     | -11.9   | 0.57 |
| 9   | Bisdemethoxycurcumin              | TLR2             | 1FYW     | -11.8   | 2.92 |
| 10  | Curcumin                          | TLR2             | 1FYW     | -10.7   | 1.09 |

**Table S3.** Property profile of top five selected compounds from *C. zeylanicum* plant against two selected receptors.

| Sr. No. | Ligand   | Receptor/Enzymes | PDB Code | S-Score | RMSD |
|---------|----------|------------------|----------|---------|------|
| 1       | RUTIN    | CYP2E1           | 3e6i     | -18.9   | 1.78 |
| 2       | Acarbose | CYP2E1           | 3e6i     | -15.7   | 1.45 |

|    |                              |        |      |       |      |
|----|------------------------------|--------|------|-------|------|
| 3  | Quercetin                    | CYP2E1 | 3e6i | -14.0 | 1.71 |
| 4  | Trans-2-Hydroxycinnamic Acid | CYP2E1 | 3e6i | -11.8 | 0.93 |
| 5  | SINAPIC ACID                 | CYP2E1 | 3e6i | -10.4 | 0.71 |
| 6  | RUTIN                        | TLR2   | 1FYW | -16.2 | 1.77 |
| 7  | Acarbose                     | TLR2   | 1FYW | -15.1 | 3.33 |
| 8  | Quercetin                    | TLR2   | 1FYW | -14.6 | 1.12 |
| 9  | Gallic Acid                  | TLR2   | 1FYW | -10.9 | 0.86 |
| 10 | SINAPIC ACID                 | TLR2   | 1FYW | -10.0 | 1.92 |

**Table S4.** Absorption, metabolism, and toxicity-related drug-like properties of the best-chosen compound are shown using ADMET profiling.

|                    | Curcumin | Quercetin | Caliben A | Rutin |
|--------------------|----------|-----------|-----------|-------|
| <b>Absorption</b>  |          |           |           |       |
| BBB                | -        | -         | -         | -     |
| HIA                | +        | +         | +         | +     |
| CaCo2 permeability | -        | -         | -         | -     |
| PGS                | -        | -         | -         | -     |
| PGI                | +        | -         | -         | -     |
| ROCT               | -        | -         | -         | -     |
| <b>Metabolism</b>  |          |           |           |       |
| CYP3A4 substrate   | -        | +         | -         | +     |
| CYP2C9 substrate   | -        | -         | -         | -     |
| CYP2D6 substrate   | -        | -         | -         | -     |
| CYP3A4 inhibition  | -        | +         | -         | -     |
| CYP2C9 inhibition  | +        | -         | +         | -     |
| CYP2C19inhibition  | +        | -         | +         | -     |
| CYP2D6 inhibition  | +        | -         | -         | -     |
| CYP1A2 inhibition  | +        | +         | +         | -     |
| <b>Toxicity</b>    |          |           |           |       |
| Ames toxicity      | -        | +         | -         | -     |
| Carcinogens        | -        | -         | -         | +     |

Following are abbreviations including ROCT for renal organic cation transporter; HIA: human intestinal absorption; PGS: P-glycoprotein substrate; PGI: P-glycoprotein inhibitor; BBB for blood-brain barrier.

**Table S5.** S-score table of curcumin, quercetin and silymarin with liver injury receptors.

| Sr. No | Receptor/Enzymes | Ligand   | S-score |
|--------|------------------|----------|---------|
|        | TLR4             | Curcumin | -7.3    |
|        | NF-kB            | Curcumin | -6.0    |
|        | NLRP3            | Curcumin | -5.8    |
|        | MAPKs            | Curcumin | -5.8    |
|        | CYP1A2           | Curcumin | -8.7    |
|        | CYP2C9           | Curcumin | -9.2    |
|        | CYP2E1           | Curcumin | -6.1    |
|        | CYP2D6           | Curcumin | -7.9    |
|        | CYP3A4           | Curcumin | -7.8    |
|        | COX-2            | Curcumin | -6.0    |
|        | PINK-1           | Curcumin | -6.0    |
|        | FXR              | Curcumin | -5.7    |
|        | TGF-β            | Curcumin | -4.9    |
|        | LRH-1            | Curcumin | -4.2    |

|              |           |       |
|--------------|-----------|-------|
| RAGE         | Curcumin  | -6.3  |
| TLR4         | Quercetin | -8.2  |
| NF-kB        | Quercetin | -8.7  |
| NLRP3        | Quercetin | -7.5  |
| MAPKs        | Quercetin | -9.2  |
| CYP1A2       | Quercetin | -8.3  |
| CYP2C9       | Quercetin | -8.8  |
| CYP2E1       | Quercetin | -7.4  |
| CYP2D6       | Quercetin | -8.1  |
| CYP3A4       | Quercetin | -7.5  |
| COX-2        | Quercetin | -8.3  |
| PINK-1       | Quercetin | -7.2  |
| FXR          | Quercetin | -8.7  |
| TGF- $\beta$ | Quercetin | -7.1  |
| LRH-1        | Quercetin | -7.7  |
| RAGE         | Quercetin | -9.3  |
| TLR4         | Silymarin | -9.0  |
| NF-kB        | Silymarin | -8.7  |
| NLRP3        | Silymarin | -10.8 |
| MAPKs        | Silymarin | -10.8 |
| CYP1A2       | Silymarin | -9.8  |
| CYP2C9       | Silymarin | -8.5  |
| CYP2E1       | Silymarin | -8.9  |
| CYP2D6       | Silymarin | -9.0  |
| CYP3A4       | Silymarin | -9.8  |
| COX-2        | Silymarin | -8.9  |
| PINK-1       | Silymarin | -10   |
| FXR          | Silymarin | -9.8  |
| TGF- $\beta$ | Silymarin | -8.8  |
| LRH-1        | Silymarin | -9.2  |
| RAGE         | Silymarin | -10.7 |

**Table S6.** Interactions of curcumin, quercetin and silymarin with liver injury receptors/enzymes.

| Receptor/Enzyme Name | Curcumin | Quercetin | Silymarin |
|----------------------|----------|-----------|-----------|
| TLR4                 |          |           |           |
| NF-kB                |          |           |           |
| NLRP3                |          |           |           |
| MAPKs                |          |           |           |
| CYP1A2               |          |           |           |

CYP2C9

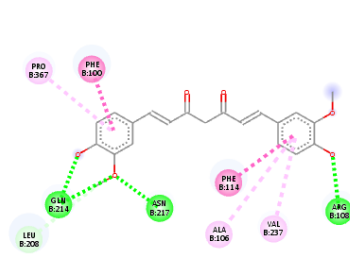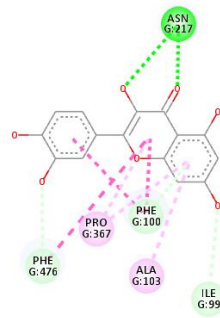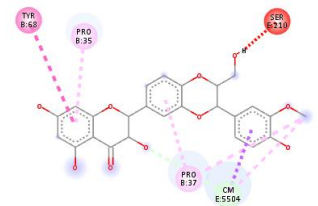

CYP2E1

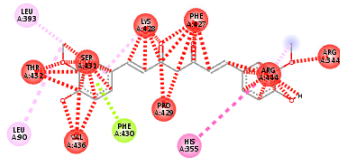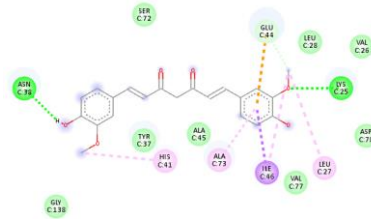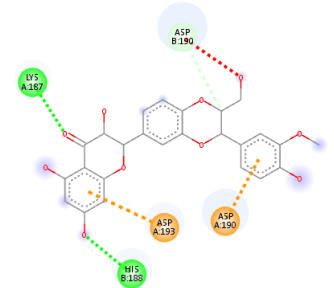

CYP2D6

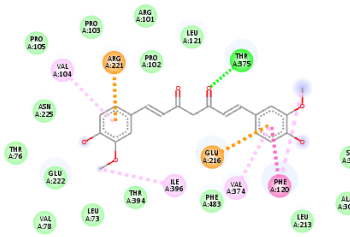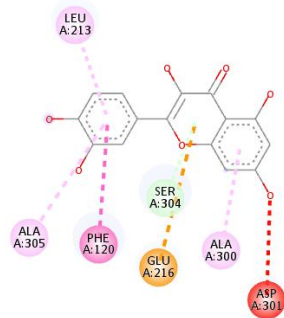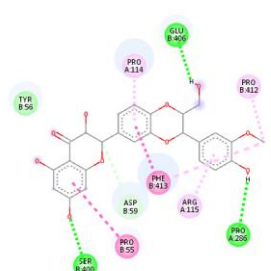

CYP3A4

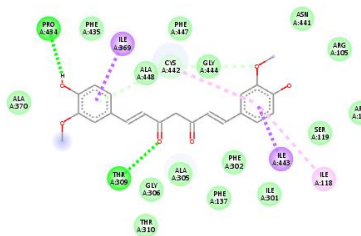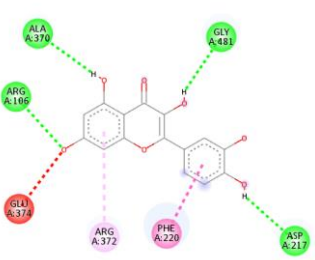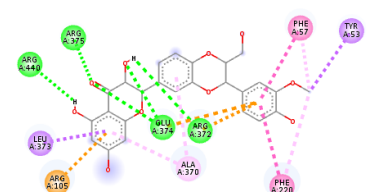

COX-2

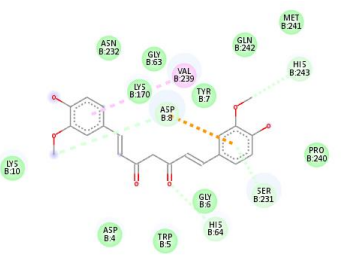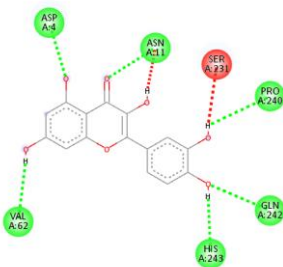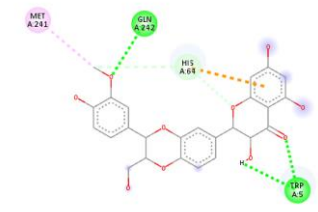

PINK-1

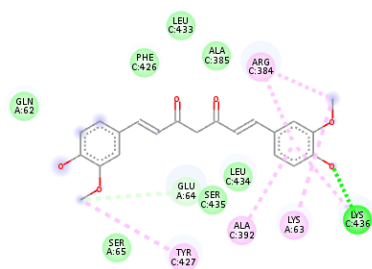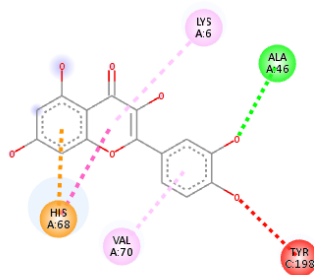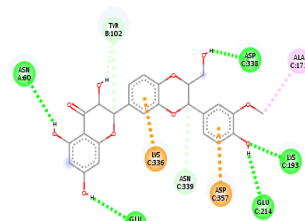

FXR

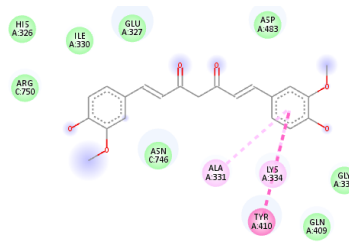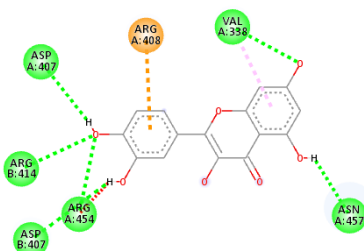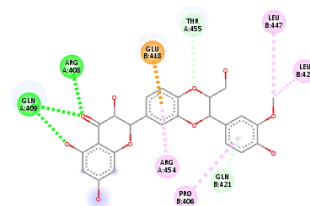

TGF- $\beta$

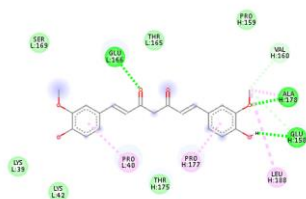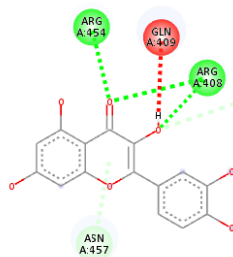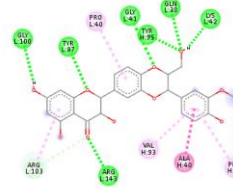

LRH-1

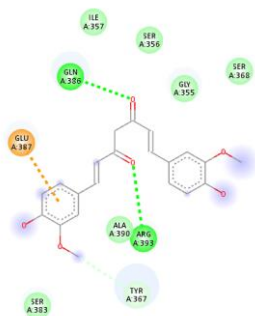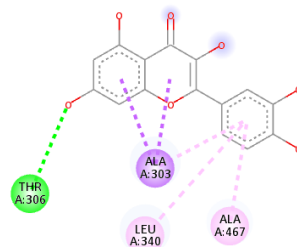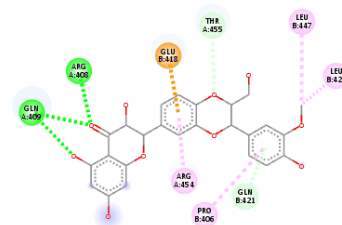

RAGE

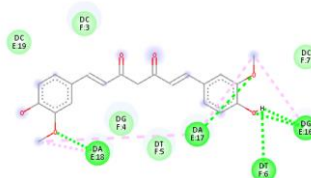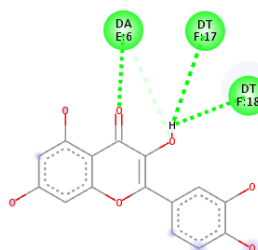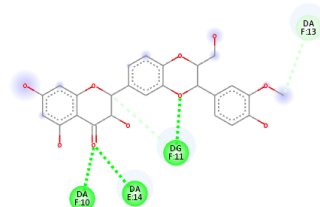

**Table S7.** Values of serum enzymes ALT, AST & ALP and serum bilirubin (T-Bil).

| <b>Treatment</b>                | <b>ALT</b>    | <b>AST</b>    | <b>ALP</b>    | <b>Bilirubin</b> |
|---------------------------------|---------------|---------------|---------------|------------------|
| Control group                   | 116.33 ± 0.1  | 180 ± 0.01    | 126.05 ± 0.01 | 0.55 ± 0.1       |
| Induced toxicity group          | 552 ± 0.01    | 287.67 ± 0.02 | 134 ± 0.1     | 0.52 ± 0.02      |
| Protective group of Quercetin   | 75.5 ± 0.1    | 192.5 ± 0.1   | 27.5 ± 0.01   | 0.47 ± 0.1       |
| Protective group of Curcumin    | 90.67 ± 0.02  | 90.67 ± 0.02  | 103.33 ± 0.02 | 0.51 ± 0.01      |
| Protective group of combination | 147.5 ± 0.1   | 176 ± 0.1     | 158 ± 0.1     | 0.57 ± 0.02      |
| Protective group for silymarin  | 177.67 ± 0.02 | 223 ± 0.02    | 46 ± 0.01     | 0.45 ± 0.1       |

Results are expressed as mean ± (SEM).
